# Supplementary material for: Changing the incentive structure of social media platforms to halt the spread of misinformation
Source: eLife journal article supplement (doi:10.7554/elife.85767), 2023-04-24
Supplement: figures [file elife-85767-figures-v1.pdf]

---

## Figures and figure supplements

Changing the incentive structure of social media platforms to halt the spread of misinformation

**Laura K Globig et al.**

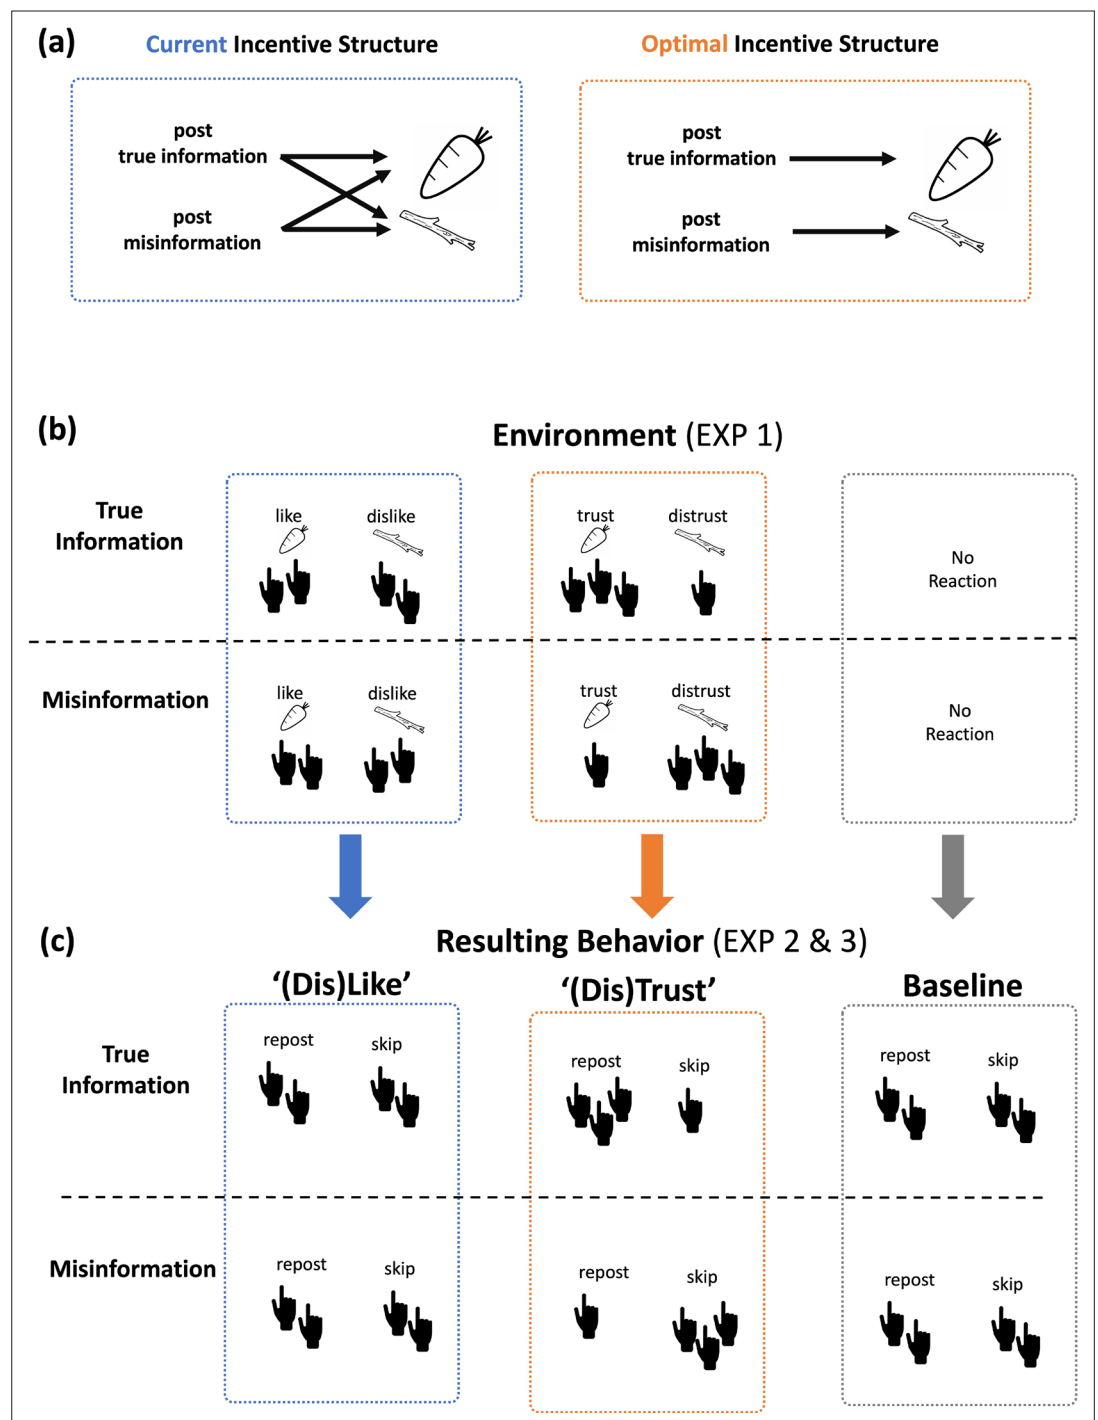

**Figure 1.** Theoretical framework. (a) The current incentive structure (blue) is such that the veracity of shared information is dissociated from rewards ('carrots') and punishments ('sticks'). That is, true information and misinformation may lead to roughly equal number of rewards and punishments. An optimal incentive structure (orange) is such that sharing true information is rewarded with more 'carrots' than sharing misinformation, which in turn is penalized with more 'sticks' than true information. To create an optimal environment, an intervention is needed by which the number of rewards and punishments are directly associated with the veracity of information. (b) We test one such possible intervention (Experiment 1). In particular, we allow people to engage with posts using 'trust' reaction buttons and 'distrust' reaction buttons (orange). The rationale is that they will use these reactions to discern true from false information more so than 'like' and 'dislike' reaction buttons. (c) As a result, to obtain a greater number of 'trust' carrots and a smaller number of 'distrust' sticks in response to a post, people in

*Figure 1 continued on next page*

*Figure 1 continued*

the optimal environment (orange) will share more true than misinformation compared to those in the suboptimal environment which includes no feedback at all (gray), and those in an environment where the association between veracity of information and number of carrots and sticks is weak (blue). This second step is tested in Experiments 2 and 3.

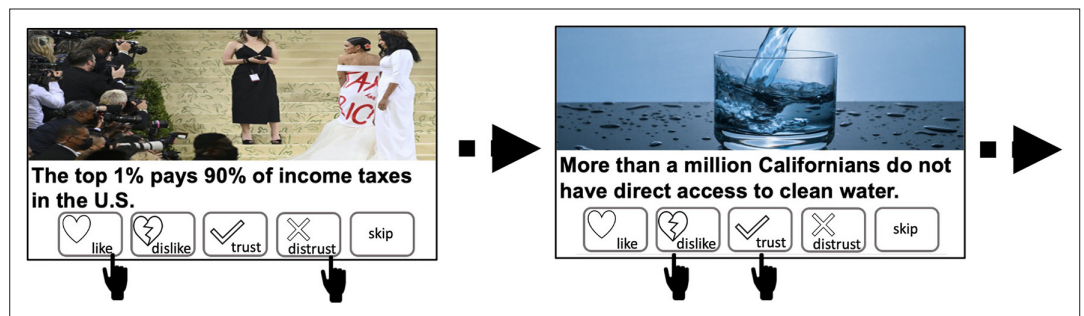

**Figure 2.** Task (Experiment 1). Participants observed a series of 100 posts in random order (50 true, 50 false). Their task was to react using one or more of the 'like', 'dislike', 'trust', or 'distrust' buttons or to skip. The task was self-paced.

## Welcome to this Study!

We are interested in how people engage on social media networks. To do this we have created a new social media network. You will view a series of real posts on your newsfeed. For each post you can choose to do one, all or none of the following:

-  **Like:** This shows that you like the post.
-  **Dislike:** This shows that you don't like the post.
-  **Trust:** This shows that you trust the post.
-  **Distrust:** This shows that you don't trust the post.

If you decide to do none of the above, please choose **skip**.

Your actions in this study have real consequences. **If you choose to engage with a post, the other participants in this study will see this response to the post.**

**Treat this like any other social media platform you currently use. There are no right or wrong responses.**

In order to make sure that you are paying attention, we will ask you to remember some of the posts at the end of the experiment. If you accurately remember whether a post we show you at the end, was shown to you during the main task you will receive a **50 cent bonus**.

**Figure 2—figure supplement 1.** Instructions for Experiment 1. At the start of the experiment participants received extensive instructions explaining the task.

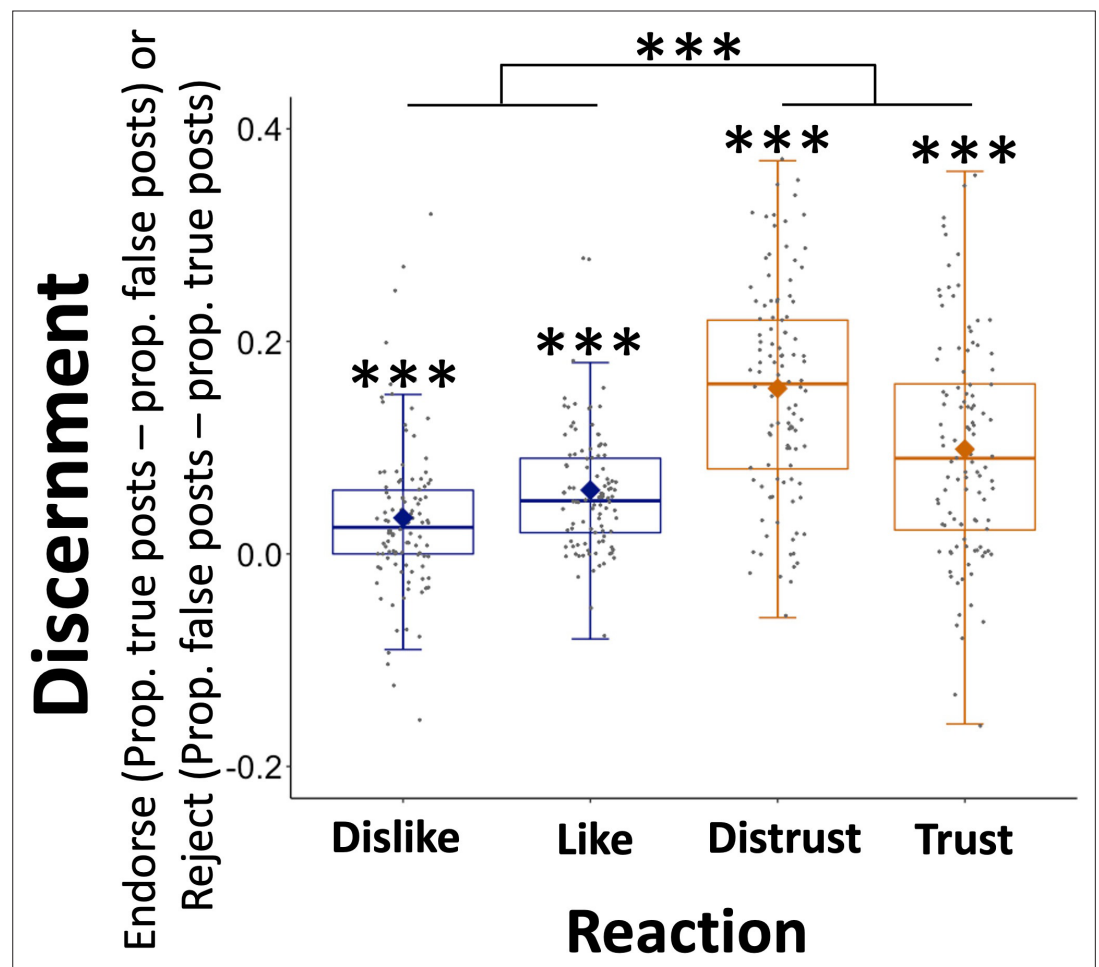

**Figure 3.** Participants use 'trust' and 'distrust' reactions to discern true from false information. 'Distrust' and 'trust' reactions were used in a more discerning manner than 'like' and 'dislike' reactions. Y axis shows discernment between true and false posts. For positive reactions (e.g., 'likes' and 'trusts'), discernment is equal to the proportion of positive reactions for true information minus false information, and vice versa for negative reactions ('dislikes' and 'distrusts'). X axis shows reaction options. Data are plotted as box plots for each reaction button, in which horizontal lines indicate median values, boxes indicate 25/75% interquartile range and whiskers indicate  $1.5 \times$  interquartile range. Diamond shape indicates the mean discernment per reaction. Individuals' mean discernment data are shown separately as gray dots. Symbols above each box plot indicate significance level compared to 0 using a t-test.  $N=106$ , \*\*\* $p < 0.001$ .

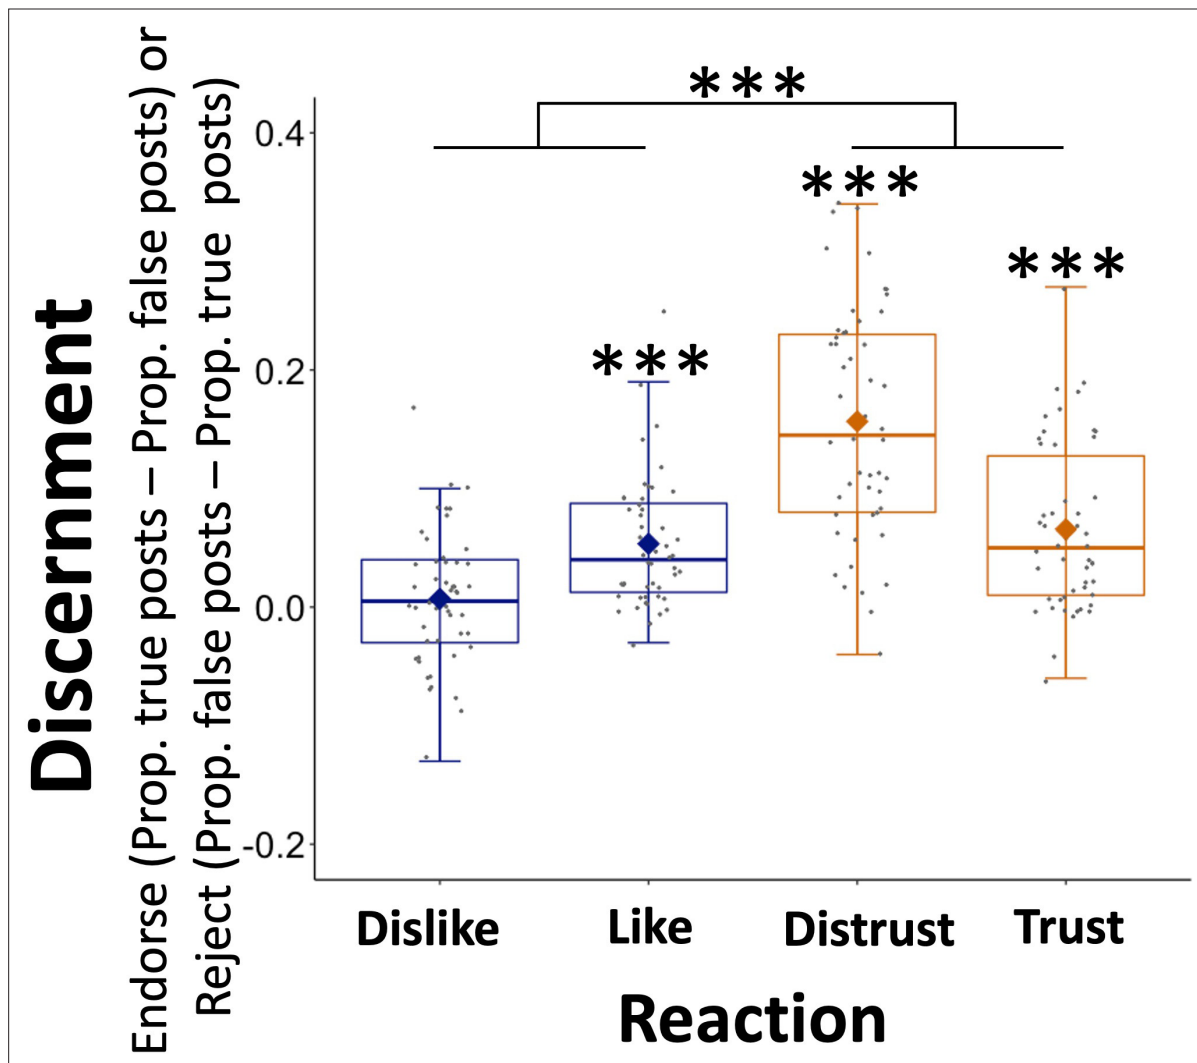

**Figure 3—figure supplement 1.** Participants' use '(Dis)Trust' buttons to discern true from false information (Experiment 4). Experiment 4 is a replication of Experiment 1, in which participants (N=50) observe posts (half true half false) and can respond by clicking all, none or some of the following buttons: 'like', 'dislike', 'trust', and 'distrust' (see Materials and methods for details). Y axis shows discernment. For positive reactions (e.g., 'likes' and 'trusts') discernment is equal to the proportion of those reactions in response to true posts minus false posts, and vice versa for negative reactions ('dislikes' and 'distrusts'). A 2 (type of reaction: 'trust' and 'distrust'/'like' and 'dislike') by 2 (valence: positive, i.e., 'like', 'trust'/negative, i.e., 'dislike', 'distrust') within-subject analysis of variance (ANOVA) revealed an effect of type of feedback ( $F(1,49) = 51.996$ ,  $p < 0.001$ , partial  $\eta^2 = 0.51$ ): participants used '(Dis)Trust' ( $M = 0.111$ ;  $SE = 0.01$ ) in a more discerning manner than '(Dis)Like' ( $M = 0.03$ ;  $SE = 0.006$ ). There was also an effect of valence ( $F(1,49) = 7.147$ ,  $p = 0.01$ , partial  $\eta^2 = 0.13$ ): participants used negative reactions ( $M = 0.082$ ;  $SE = 0.011$ ) in a more discerning manner than positive reactions ( $M = 0.06$ ,  $SE = 0.006$ ). Participants' used all reaction buttons, except 'dislike', to discern between true and false posts ('like':  $M = 0.053$ ;  $SE = 0.008$ ;  $t(49) = 6.982$ ,  $p < 0.001$ , Cohen's  $d = 0.987$ ; 'trust':  $M = 0.066$ ;  $SE = 0.01$ ;  $t(49) = 6.641$ ,  $p < 0.001$ , Cohen's  $d = 0.939$ ; 'dislike':  $M = 0.007$ ;  $SE = 0.008$ ;  $t(49) = 0.883$ ,  $p = 0.381$ , Cohen's  $d = 0.125$ ; 'distrust':  $M = 0.157$ ;  $SE = 0.014$ ;  $t(49) = 11.312$ ,  $p < 0.001$ , Cohen's  $d = 1.6$ ). Data are plotted as box plots for each reaction, in which horizontal lines indicate median values, boxes indicate 25/75% interquartile range, and whiskers indicate  $1.5 \times$  interquartile range. Diamond shape indicates the mean discernment per reaction. Individuals' mean discernment data are shown separately as gray dots. Symbols above each box plot indicate significance level compared to 0 using a t-test. \*\*\* $p < 0.001$ .

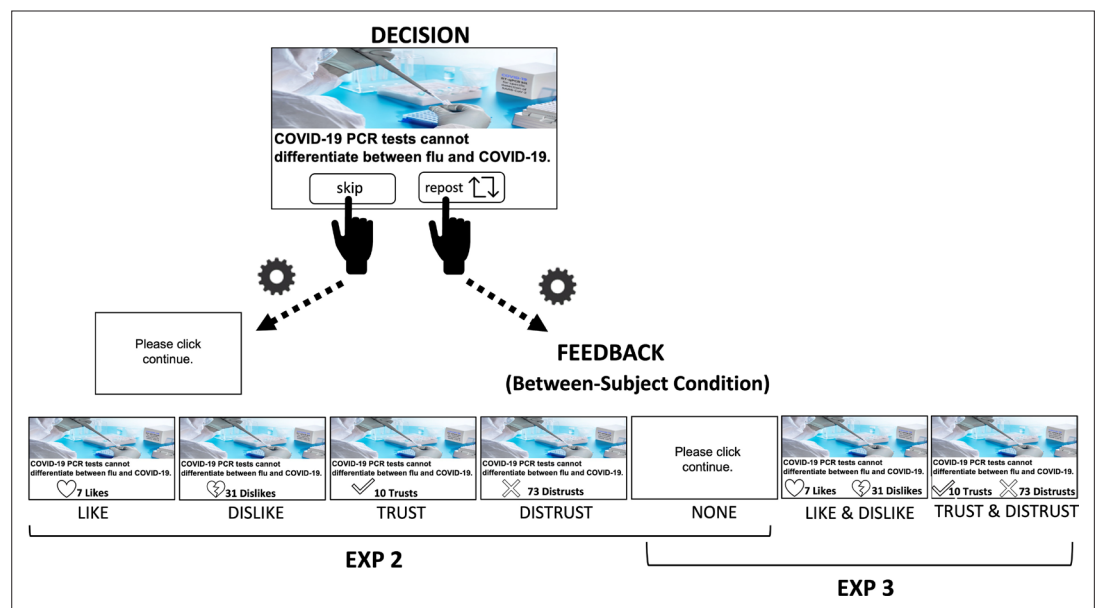

**Figure 4.** Task. In Experiment 2 on each of 100 trials participants observed a post (50 true, 50 false content). They then chose whether to share it or skip (self-paced). They were told that if they chose to share a post, it would be shared to their feed such that other participants would be able to see the post and react to it in real time (*feedback*). Depending on the environment participants were in, they could either observe the number of (1) ‘dislikes’ ( $N = 45$ ), (2) ‘likes’ ( $N = 89$ ), (3) ‘distrusts’ ( $N = 49$ ), or (4) ‘trusts’ ( $N = 46$ ) feedback. The feedback was in fact the number of reactions gathered from Experiment 1, though the participants believed the reactions were in real time as indicated by a rotating cogwheel (1 s). Once the feedback appeared, participants could then click continue. If participants selected to skip, they would observe a white screen asking them to click continue (self-paced). In the *Baseline* environment ( $N = 59$ ) participants received no feedback. Experiment 3 was identical to Experiment 2 with two distinctions: (1) Depending on the environment participants were in, they could either observe the number of (i) both ‘dislikes’ and ‘likes’ ( $N = 128$ ), (ii) both ‘distrusts’ and ‘trusts’ ( $N = 137$ ), or (iii) no feedback (*Baseline*,  $N = 126$ ). (2) In Experiment 3, we selected 40 posts (20 true, 20 false) to which Republicans and Democrats had on average reacted to similarly using the ‘trust’ button in Experiment 1. Discernment was calculated for each participant by subtracting the proportion of sharing false information from the proportion of sharing true information. High discernment indicates greater sharing of true than false information.

**(a)** Welcome to this Study!

We are interested in how people engage on social media networks. To do this we have created a new social media network. You will view a series of real posts on your newsfeed. For each post you can decide whether you want to repost, and therefore share, the post or not. This is how the repost option looks like:

 **Repost: This shares the post on your feed.**

If you decide against sharing the post, please choose **skip**.

Your actions in this study have real consequences. **If you choose to repost, the other participants (50% Republicans and 50% Democrats) in this study will see that you shared this post.**

**Treat this like any other social media platform you currently use. There are no right or wrong responses.**

Note: The duration of the task is always the same regardless of what response option you choose. In order to make sure that you are paying attention, we will ask you to remember some of the posts at the end of the experiment. If you accurately remember whether a post we show you at the end, was shown to you during the main task you will receive a **10 cent bonus**.

**(b)** Welcome to this Study!

We are interested in how people engage on social media networks. To do this we have created a new social media network. You will view a series of real posts on your newsfeed. For each post you can decide whether you want to repost, and therefore share, the post or not. This is how the repost option looks like:

 **Repost: This shares the post on your feed.**

If you decide against sharing the post, please choose **skip**.

Your actions in this study have real consequences. **If you choose to repost, the other participants in this study (50% Republicans and 50% Democrats) will see that you shared this post.** They can then either choose to scroll on or to react to the post in real time by pressing

 **Like: This shows that they like the post.**

You will then be able to see how they reacted to the post.

**Treat this like any other social media platform you currently use. There are no right or wrong responses.**

Note: The duration of the task is always the same regardless of what response option you choose. In order to make sure that you are paying attention, we will ask you to remember some of the posts at the end of the experiment. If you accurately remember whether a post we show you at the end, was shown to you during the main task you will receive a **10 cent bonus**.

**(c)** Welcome to this Study!

We are interested in how people engage on social media networks. To do this we have created a new social media network. You will view a series of real posts on your newsfeed. For each post you can decide whether you want to repost, and therefore share, the post or not. This is how the repost option looks like:

 **Repost: This shares the post on your feed.**

If you decide against sharing the post, please choose **skip**.

Your actions in this study have real consequences. **If you choose to repost, the other participants in this study (50% Republicans and 50% Democrats) will see that you shared this post.** They can then either choose to scroll on or to react to the post in real time by pressing

 **Dislike: This shows that they don't like the post.**

You will then be able to see how they reacted to the post.

**Treat this like any other social media platform you currently use. There are no right or wrong responses.**

Note: The duration of the task is always the same regardless of what response option you choose. In order to make sure that you are paying attention, we will ask you to remember some of the posts at the end of the experiment. If you accurately remember whether a post we show you at the end, was shown to you during the main task you will receive a **10 cent bonus**.

**(d)** Welcome to this Study!

We are interested in how people engage on social media networks. To do this we have created a new social media network. You will view a series of real posts on your newsfeed. For each post you can decide whether you want to repost, and therefore share, the post or not. This is how the repost option looks like:

 **Repost: This shares the post on your feed.**

If you decide against sharing the post, please choose **skip**.

Your actions in this study have real consequences. **If you choose to repost, the other participants (50% Republicans and 50% Democrats) in this study will see that you shared this post.** They can then either choose to scroll on or to react to the post in real time by pressing

 **Trust: This shows that they trust the post.**

You will then be able to see how they reacted to the post.

**Treat this like any other social media platform you currently use. There are no right or wrong responses.**

Note: The duration of the task is always the same regardless of what response option you choose. In order to make sure that you are paying attention, we will ask you to remember some of the posts at the end of the experiment. If you accurately remember whether a post we show you at the end, was shown to you during the main task you will receive a **10 cent bonus**.

**(e)** Welcome to this Study!

We are interested in how people engage on social media networks. To do this we have created a new social media network. You will view a series of real posts on your newsfeed. For each post you can decide whether you want to repost, and therefore share, the post or not. This is how the repost option looks like:

 **Repost: This shares the post on your feed.**

If you decide against sharing the post, please choose **skip**.

Your actions in this study have real consequences. **If you choose to repost, the other participants (50% Republicans and 50% Democrats) in this study will see that you shared this post.** They can then either choose to scroll on or to react to the post in real time by pressing

 **Distrust: This shows that they don't trust the post.**

You will then be able to see how they reacted to the post.

**Treat this like any other social media platform you currently use. There are no right or wrong responses.**

Note: The duration of the task is always the same regardless of what response option you choose. In order to make sure that you are paying attention, we will ask you to remember some of the posts at the end of the experiment. If you accurately remember whether a post we show you at the end, was shown to you during the main task you will receive a **10 cent bonus**.

**Figure 4—figure supplement 1.** Instructions for Experiment 2. At the start of the experiment participants received extensive instructions explaining the task. Depending on which condition they were assigned to participants would receive Instructions for either the (a) Baseline environment, (b) Like environment, (c) Dislike environment, (d) Trust environment, or (e) Distrust environment.

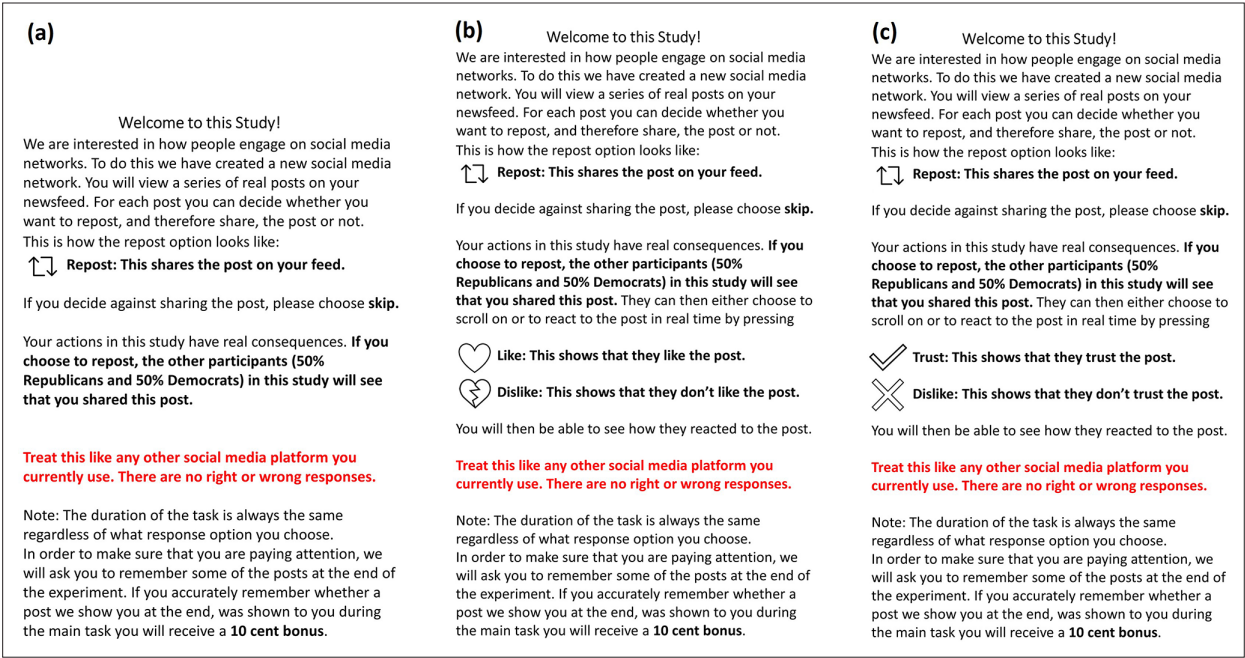

**Figure 4—figure supplement 2.** Instructions for Experiment 3. At the start of the experiment participants received extensive instructions explaining the task. Depending on which condition they were assigned to participants would receive Instructions for either the **(a)** Baseline environment, **(b)** Like & Dislike environment, or **(c)** Trust & Distrust environment.

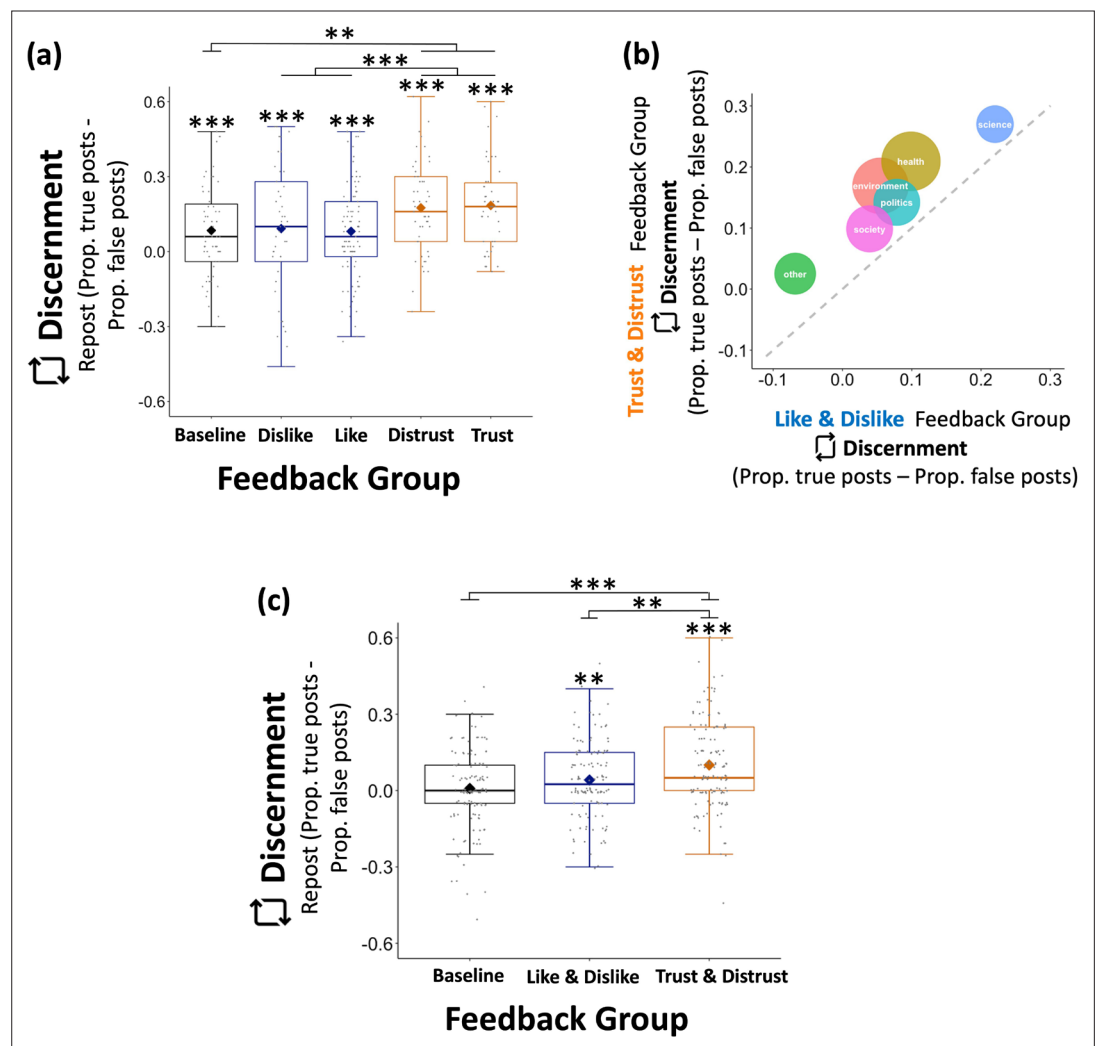

**Figure 5.** Altering the incentive structure of social media environments increases discernment of information shared. (a) Participants (N=288) operating in an environment where '(Dis)Trust' feedback was introduced shared more true information relative to false information than participants operating in an environment where only '(Dis) Like' feedback was available, or no feedback at all (Baseline) Y axis shows discernment, that is, proportion of true posts shared minus proportion of false posts shared. X axis shows the group environment (type of feedback). (b) This was the case regardless of the topic of the post (politics, science, health, environment, society, other). Bubble size corresponds to number of the posts included in the study. Diagonal dashed line indicates point of equivalence, where discernment is equal across the '(Dis)Like' and '(Dis)Trust' environments. As can be seen, all circles are above the dashed line indicating that in all cases discernment is greater in an environment that offers '(Dis)Trust' feedback. Y axis shows discernment in the '(Dis)Trust' environment, X axis shows discernment in the '(Dis)Like' environment. (c) Experiment 3 (N=391) showed the same results as Experiment 2. Data are plotted as box plots for each reaction, in which horizontal lines indicate median values, boxes indicate 25/75% interquartile range, and whiskers indicate  $1.5 \times$  interquartile range. Diamond shape indicates the mean discernment per reaction. Individuals' mean discernment data are shown separately as gray dots; symbols above each box plot indicate significance level compared to 0 using a t-test. \*\*\* $p < 0.001$ , \*\* $p < 0.01$ .

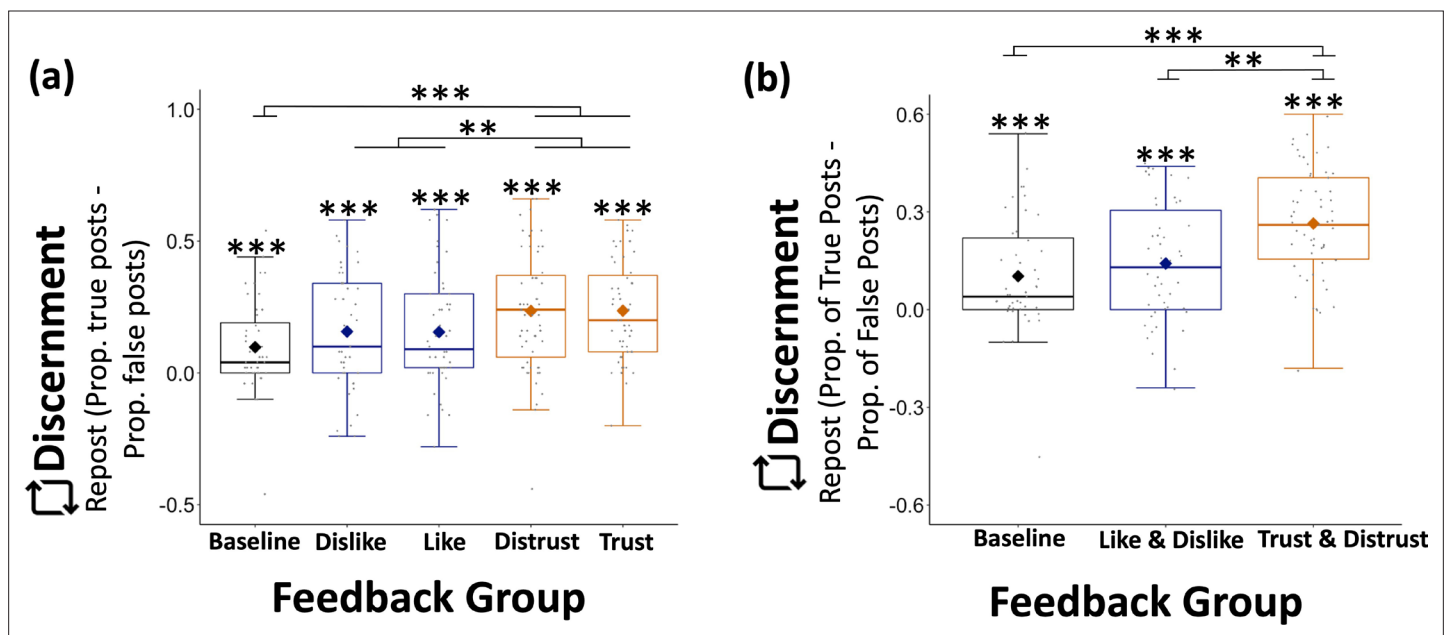

**Figure 5—figure supplement 1.** ‘(Dis)Trust’ feedback improves discernment in sharing behavior (Experiments 5 and 6). **(a)** Experiment 5 and **(b)** Experiment 6 are replications of Experiments 2 and 3. **(a)** In Experiment 5 participants (N=261) observed the same 100 posts (50 true, 50 false) shown to participants in Experiment 4, but instead of reacting to the posts they could either share the post or skip it. Depending on their group, participants would then receive feedback from other participants in the form of the number of either (1) ‘dislikes’, or (2) ‘likes’, or (3) ‘distrusts’, or (4) ‘trusts’. The Baseline group received no feedback (see Materials and methods for details). On the Y axis is ‘Discernment’ = proportion of sharing true information – proportion of sharing false information. A between-subject analysis of variance (ANOVA) on discernment with *type of feedback* (‘trust’ and ‘distrust’/‘like’ and ‘dislike’/Baseline) and *valence* (positive, i.e., ‘like’, ‘trust’/negative, i.e., ‘dislike’, ‘distrust’ vs neutral/no feedback) revealed an effect of type of feedback ( $F(1,257) = 8.112$ ,  $p = 0.005$ , partial  $\eta^2 = 0.031$ ): discernment was greater in the ‘(Dis)Trust’ conditions ( $M = 0.236$ ,  $SE = 0.019$ ) than the ‘(Dis)Like’ ( $M = 0.111$ ,  $SE = 0.022$ ;  $F(1,212) = 7.682$ ,  $p = 0.006$ , partial  $\eta^2 = 0.035$ ) and Baseline ( $M = 0.102$ ,  $SE = 0.026$ ;  $F(1,163) = 16.246$ ,  $p < 0.001$ , partial  $\eta^2 = 0.087$ ) conditions. No other effects were significant. **(b)** Experiment 6 (N=150) was the same as Experiment 5, but with three groups: Baseline group (receiving no feedback), ‘Trust & Distrust’ group, in which participants received both the number of *Trust* and *Distrust* feedback, and a ‘Like & Dislike’ environment, in which participants received the number of *Like* and *Dislike* feedback (see Materials and methods and for details). Once again, an ANOVA revealed a main effect of type of feedback ( $F(1,147) = 11.150$ ,  $p < 0.001$ , partial  $\eta^2 = 0.132$ ): participants in the ‘Trust and Distrust’ group were more discerning ( $M = 0.264$ ,  $SE = 0.023$ ) than those in the ‘Like and Dislike’ ( $M = 0.147$ ,  $SE = 0.027$ ;  $F(1,101) = 11.122$ ,  $p = 0.001$ , partial  $\eta^2 = 0.099$ ) and baseline ( $M = 0.106$ ,  $SE = 0.026$ ;  $F(1,101) = 21.141$ ,  $p < 0.001$ , partial  $\eta^2 = 0.173$ ) groups. Data are plotted as box plots for each reaction, in which horizontal lines indicate median values, boxes indicate 25/75% interquartile range, and whiskers indicate  $1.5 \times$  interquartile range. Diamond shape indicates the mean discernment per reaction. Individuals’ mean discernment data are shown separately as gray dots; symbols above each box plot indicate significance level compared to 0 using a t-test. \*\*\* $p < 0.001$ , \*\* $p < 0.01$ .

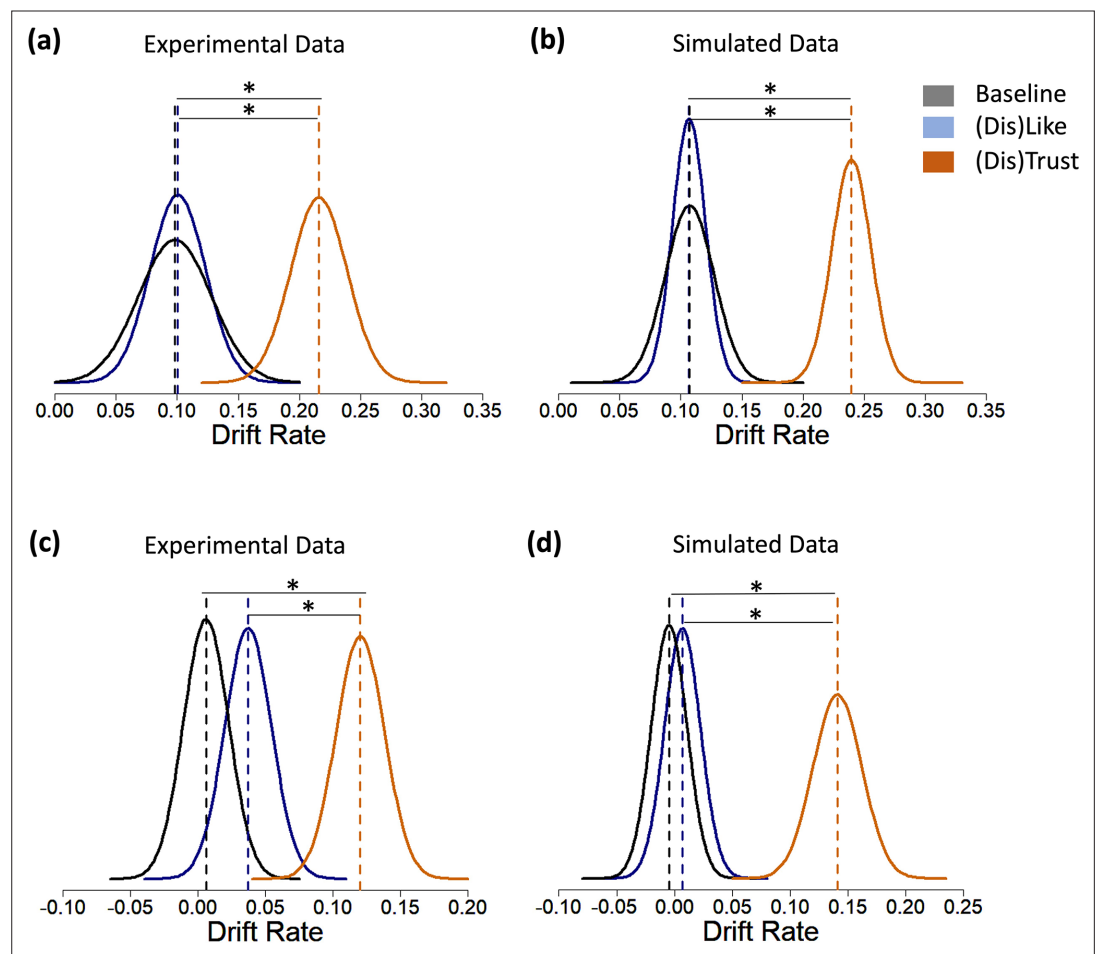

**Figure 6.** '(Dis)Trust' feedback increases the drift rate. Displayed are the posterior distributions of parameter estimates for the Baseline environment, the '(Dis)Like' environment and the '(Dis)Trust' environment. Dashed vertical lines indicate respective group means. In both (a) Experiment 2 (N=288) and (c) Experiment 3 (N=391) highest density interval (HDI) comparison revealed that participants had a larger drift rate in the '(Dis)Trust' environments than in the other environments. No credible difference was observed between the latter two environments. Recovered model parameter estimates reproduced experimental results for both (b) Experiment 2 and (d) Experiment 3. \* indicates credible difference between environments.

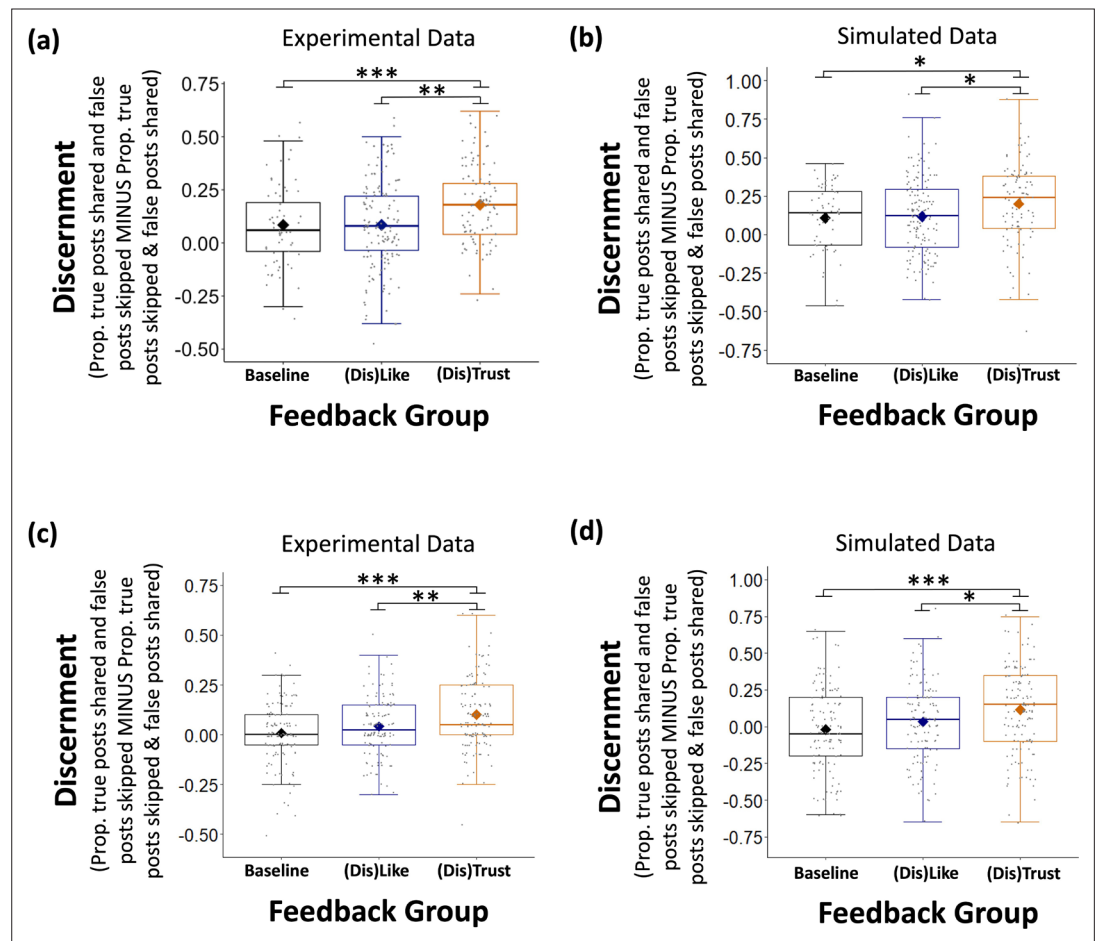

**Figure 7.** Simulated data reproduced experimental findings. One-way ANOVAs revealed that In both (a) Experiment 2 (N=288) and (c) Experiment 3 (N=391) participants who received '(Dis)Trust' feedback were more discerning than participants in the '(Dis)Like' and Baseline environments. Simulated data reproduced these findings (b, d). Y axis shows discernment, that is, proportion of true posts shared and false posts skipped MINUS Prop. true posts skipped & false posts shared. X axis shows feedback group. Data are plotted as box plots for each reaction, in which horizontal lines indicate median values, boxes indicate 25/75% interquartile range and whiskers indicate  $1.5 \times$  interquartile range. Diamond shape indicates the mean discernment per reaction. Individuals' mean discernment data are shown separately as gray dots; symbols above each box plot indicate significance level compared to 0 using a t-test. \*\*\* $p < 0.001$ , \*\* $p < 0.01$ , \* $p < 0.05$ .
